RESEARCH ARTICLE

# Day–night variation and age-related differences in gadolinium-based contrast media enhancement in the brain: A T1 mapping study

Dongjun Lee<sup>1</sup>, Yangsean Choi<sup>1\*</sup>, Eunseon Jeong<sup>1</sup>, Yoonho Nam<sup>2</sup>, Sungyang Jo<sup>3</sup>, Sun Ju Chung<sup>3</sup>, Ho-Sung Kim<sup>1</sup>

**1** Department of Radiology and Research Institute of Radiology, University of Ulsan College of Medicine, Seoul, Republic of Korea, **2** Department of Biomedical Engineering, Hankuk University of Foreign Studies, Yongin-Si, Gyeonggi-do, Republic of Korea, **3** Department of Neurology, Asan Medical Center, University of Ulsan College of Medicine, Seoul, Republic of Korea

\* [phillipchoi007@gmail.com](mailto:phillipchoi007@gmail.com)

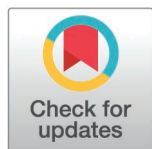

**OPEN ACCESS**

**Citation:** Lee D, Choi Y, Jeong E, Nam Y, Jo S, Chung SJ, et al. (2026) Day–night variation and age-related differences in gadolinium-based contrast media enhancement in the brain: A T1 mapping study. *PLoS One* 21(4): e0346730. <https://doi.org/10.1371/journal.pone.0346730>

**Editor:** Assoc. Prof. Phakharawat Sittiprapaporn, Mae Fah Luang University School of Anti Aging and Regenerative Medicine, THAILAND

**Received:** November 5, 2025

**Accepted:** March 23, 2026

**Published:** April 9, 2026

**Copyright:** © 2026 Lee et al. This is an open access article distributed under the terms of the [Creative Commons Attribution License](https://creativecommons.org/licenses/by/4.0/), which permits unrestricted use, distribution, and reproduction in any medium, provided the original author and source are credited.

**Data availability statement:** The minimal de-identified dataset underlying the findings of this study is publicly available in figshare at: <https://doi.org/10.6084/m9.figshare.31322251>. The email address of the Institutional Review

## Abstract

The glymphatic system clears metabolic waste from the brain and can be probed using contrast-enhanced MRI. We investigated whether early-phase gadolinium-based contrast agent (GBCA) uptake varies with time of day and age. In this retrospective study, 447 patients who underwent brain MRI for suspected movement disorders received pre- and post-contrast T1 mapping a median of 5.9 minutes after GBCA injection. Scans were categorized as daytime (n=307) or nighttime (n=140). Regional  $\Delta T1$  values were measured in the cerebral and cerebellar cortices, white matter, basal ganglia perivascular spaces, and choroid plexus. Daytime cohorts showed significantly greater cortical enhancement than nighttime cohorts, particularly in the frontal, parietal, and temporal lobes, while no differences were observed in white matter, perivascular spaces, or choroid plexus. Increasing age was independently associated with stronger cortical enhancement across both day and night scans, with no significant interaction between age and time. These findings suggest that cortical GBCA retention is influenced by both circadian timing and aging, supporting early-phase T1 mapping as a practical approach to evaluate human glymphatic function.

## Introduction

The glymphatic system is a brain-wide, glial-dependent fluid transport network responsible for clearing metabolic waste products, including amyloid- $\beta$  and tau proteins, from the central nervous system [1–3]. It operates through periarterial influx, mixing with interstitial fluid (ISF), and perivenous clearance via meningeal lymphatic vessels, and depends critically on aquaporin-4 (AQP4) channels expressed on astrocytic endfeet [1,2,4–6]. Dysfunction of the glymphatic system has been associated with the accumulation of neurotoxic proteins and development of major

Board of Asan Medical Center is [irb@amc.seoul.kr](mailto:irb@amc.seoul.kr).

**Funding:** This work was supported by the National Research Foundation of Korea (NRF) grant funded by the Korea government (MSIT) (RS-2025-16064441) awarded to Y.C. and by a grant of the Korea Health Technology R&D Project through the Korea Health Industry Development Institute (KHIDI), funded by the Ministry of Health & Welfare, Republic of Korea (RS-2022-KH130266) awarded to Y.C. The funders had no role in study design, data collection and analysis, decision to publish, or preparation of the manuscript.

**Competing interests:** The authors have declared that no competing interests exist.

neurodegenerative diseases, including Alzheimer's and Parkinson's diseases [1,7,8]. Consequently, investigating the mechanisms and dynamics of glymphatic clearance is increasingly important for understanding brain health and disease.

Gadolinium-based contrast agents (GBCAs) are routinely used in magnetic resonance imaging (MRI) to visualize tissue structures and pathologies. Although GBCAs do not typically cross an intact blood-brain barrier (BBB) [9], recent evidence demonstrates that they can rapidly penetrate the blood-cerebrospinal fluid (CSF) barrier at the choroid plexus (CP) within seconds to minutes after injection. From there, they enter perivascular spaces (PVS) and, driven by glymphatic flow, distribute into the brain parenchyma [10–12]. This early phase distribution of GBCA, observable within minutes of intravenous administration, likely reflects immediate CSF-ISF exchange dynamics and early glymphatic influx.

Previous studies have extensively applied GBCA imaging to evaluate glymphatic function. Initially, glymphatic imaging relied on invasive intrathecal administration of GBCAs, limiting clinical applicability [13–16]. However, recent advancements have enabled non-invasive glymphatic assessment using various intravenous contrast-enhanced MRI techniques, including T1 mapping, heavily T2-weighted FLAIR, and dynamic susceptibility contrast MRI. These approaches enabled visualization of GBCA entry into CSF compartments via the CP, subsequent distribution along PVS, and eventual interaction with the brain parenchyma [10,12,17,18]. Although earlier studies predominantly focused on delayed imaging phases (typically 3–24 h post-injection) to evaluate glymphatic clearance [17,18], recent evidence supports the value of early-phase imaging. Human and animal studies have demonstrated GBCA entry into the CSF within minutes of intravenous injection, most notably around the CP as early as 20s [12], followed by distribution into PVS [10,11]. These findings highlight the potential of early imaging to sensitively capture the initial phase of glymphatic transport, which may become less distinct as contrast redistributes over time.

Glymphatic activity is strongly influenced by sleep, with greater clearance during sleep than wakefulness [19]. In addition, glymphatic function may be modulated by intrinsic circadian rhythms, independent of sleep [20,21]. Wakefulness itself may transiently suppress glymphatic clearance, potentially resulting in greater early-phase parenchymal enhancement [17]. Therefore, it was hypothesized that daytime MRI scans would show greater early-phase GBCA enhancement (lower T1 values) than nighttime scans, reflecting reduced glymphatic clearance.

This study primarily aimed to quantitatively evaluate circadian variations in early-phase GBCA uptake in patients with suspected movement disorders using contrast-enhanced T1 mapping. Our secondary aims were to identify specific brain regions demonstrating distinct day–night differences in early-phase enhancement and investigate the influence of age on these circadian patterns, thereby providing insight into how aging may modulate diurnal patterns of brain fluid clearance.

## Materials and methods

### Study participants

This single-center retrospective cohort study was approved by the Institutional Review Board of Asan Medical Center (IRB number: 2024–0465) and conducted in

accordance with the Declaration of Helsinki and relevant guidelines and regulations. The data were accessed for research purposes on 19/03/2025. The authors did not have access to information that could identify individual participants during or after data collection. Owing to the retrospective design, the requirement for informed consent was waived. Consecutive participants who underwent brain MRI for clinical suspicion of movement disorders between November 2023 and February 2025 were retrospectively reviewed. The inclusion criteria were as follows: (1) availability of three-dimensional T1-weighted image and (2) pre-contrast and post-contrast T1 map. The exclusion criteria were as follows: 1) significant brain atrophy or encephalomalacia and 2) unresolved co-registration errors. Co-registration refers to the spatial alignment between pre- and post-contrast images, which is essential for accurate quantitative analysis. Co-registration errors primarily resulted from excessive patient motion during MRI acquisition, and cases where adequate alignment could not be achieved using the adopted registration method were excluded. Two experienced neurologists (blinded) diagnosed idiopathic Parkinson's disease (IPD) according to the International Parkinson and Movement Disorder Society criteria [22], and essential tremor (ET) using the consensus statement criteria for tremor classification [23]. A flowchart of patient selection is illustrated in Fig 1.

### MRI acquisition

All MRI scans were performed on a 3T system equipped with a 64-channel head coil (Magnetom Vida, Siemens Healthineers, Erlangen, Germany). The imaging protocol comprised a pre-contrast Compressed Sensing Magnetization Prepared 2 Rapid Acquisition Gradient Echo (CS-MP2RAGE) sequence with multiplanar reconstructions of T1-weighted images and T1 mapping. A post-contrast CS-MP2RAGE was obtained a median of 5.9 minutes (interquartile range [IQR], 5.5–6.5) following intravenous injection of GBCA (Dotarem, Guerbet). All participants were instructed to remain awake and were unседated during the MRI examination. Detailed imaging parameters are provided in S1 Table.

### Image preprocessing

Pre-contrast T1-weighted images were registered to post-contrast T1-weighted images using a rigid-body transformation approach with 6° of freedom, implemented via FMRIB's Linear Image Registration Tool and optimized using a

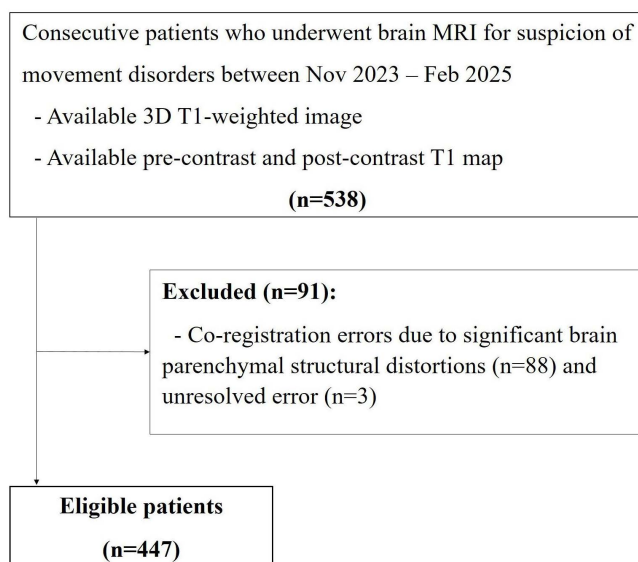

**Fig 1. Flowchart of participant selection.**

<https://doi.org/10.1371/journal.pone.0346730.g001>

least-squares cost function [24–26]. The resulting transformation matrix was applied to both pre-contrast T1-weighted images and T1 maps to ensure spatial alignment with post-contrast images. Following registration, cortical and white matter segmentations were performed on the registered pre-contrast T1-weighted images using FreeSurfer's SynthSeg [27], a deep learning-based segmentation tool for parcellating brain structures for subsequent quantitative analysis of contrast enhancement.

### Deep learning-based segmentation method

A deep learning-based model was developed for automated segmentation of the CP and basal ganglia PVS. For model training, ground truth labels were generated in 101 patients, and the trained model was applied to segment CP and basal ganglia PVS across the entire dataset. In brief, initial CP and lateral ventricle masks were generated using FreeSurfer [28], which were refined using a Gaussian Mixture Model-based approach [29]. Basal ganglia PVS were segmented using a multi-step algorithm. First, T1-weighted images were standardized using histogram equalization. A Frangi filter [30] was then applied to detect tubular structures characteristic of PVS, using scale parameters optimized for basal ganglia PVS (scale range: 1–2). Basal ganglia masks were further refined through morphological operations (binary closing followed by dilation with a spherical structuring element) to ensure comprehensive coverage. A threshold was defined as the mean vesselness response within these masks plus one standard deviation. Voxels exceeding this threshold were classified as basal ganglia PVS, with separate labels assigned to the left and right hemispheres. Final CP and basal ganglia PVS masks were reviewed and corrected by an expert radiologist (blinded) to ensure anatomical accuracy and proper delineation of these structures.

### Deep learning model training

The manually refined CP and basal ganglia PVS masks were used to train an nnU-Net model for automated segmentation [31]. Training employed dual-channel inputs, consisting of co-registered pre-contrast and post-contrast T1-weighted images. The training dataset comprised 101 paired images, and hyperparameters were optimized using five-fold cross-validation. The finalized model was then applied to the full dataset for inference. A blinded expert radiologist independently reviewed each segmentation output, and corrected false-positive and false-negative results. The overall workflow is illustrated in Fig 2.

### Statistical analysis

Data are presented as mean with standard deviation, median with interquartile range, or counts with percentages, as appropriate. Baseline characteristics between daytime and nighttime cohorts were compared using the Mann–Whitney U test for continuous variables and chi-square or Fisher's exact test for categorical variables. The daytime and nighttime cohorts were defined based on our institution's clinical MRI operational shifts (daytime: 06:00–17:59; nighttime: 18:00–05:59), which broadly correspond to typical societal activity–rest periods.

Regional differences in early-phase GBCA enhancement ( $\Delta T1$ ) between daytime and nighttime scans were evaluated using analysis of covariance, with age, sex, and clinical diagnosis included as covariates. Covariates were selected a priori: age (a known determinant of glymphatic function [4,32]), sex (potential sex-related differences in brain fluid dynamics [33]), and clinical diagnosis (to account for the heterogeneous diagnostic composition and significant between-group difference in diagnostic distribution). The effect of age on cortical  $\Delta T1$  values was examined using linear regression analyses performed separately for the daytime and nighttime cohorts, adjusting for sex and clinical diagnosis. Regression coefficients ( $\beta$ ) were reported as the change in  $\Delta T1$  per one-year increase in age. To determine whether age-related slopes differed between groups, interaction analyses were performed by including an age  $\times$  scan time term in the models.

All tests were two-sided, and statistical significance was defined as  $P < 0.05$ . All statistical analyses were performed using R software (version 4.3.2; R Foundation for Statistical Computing, Vienna, Austria).

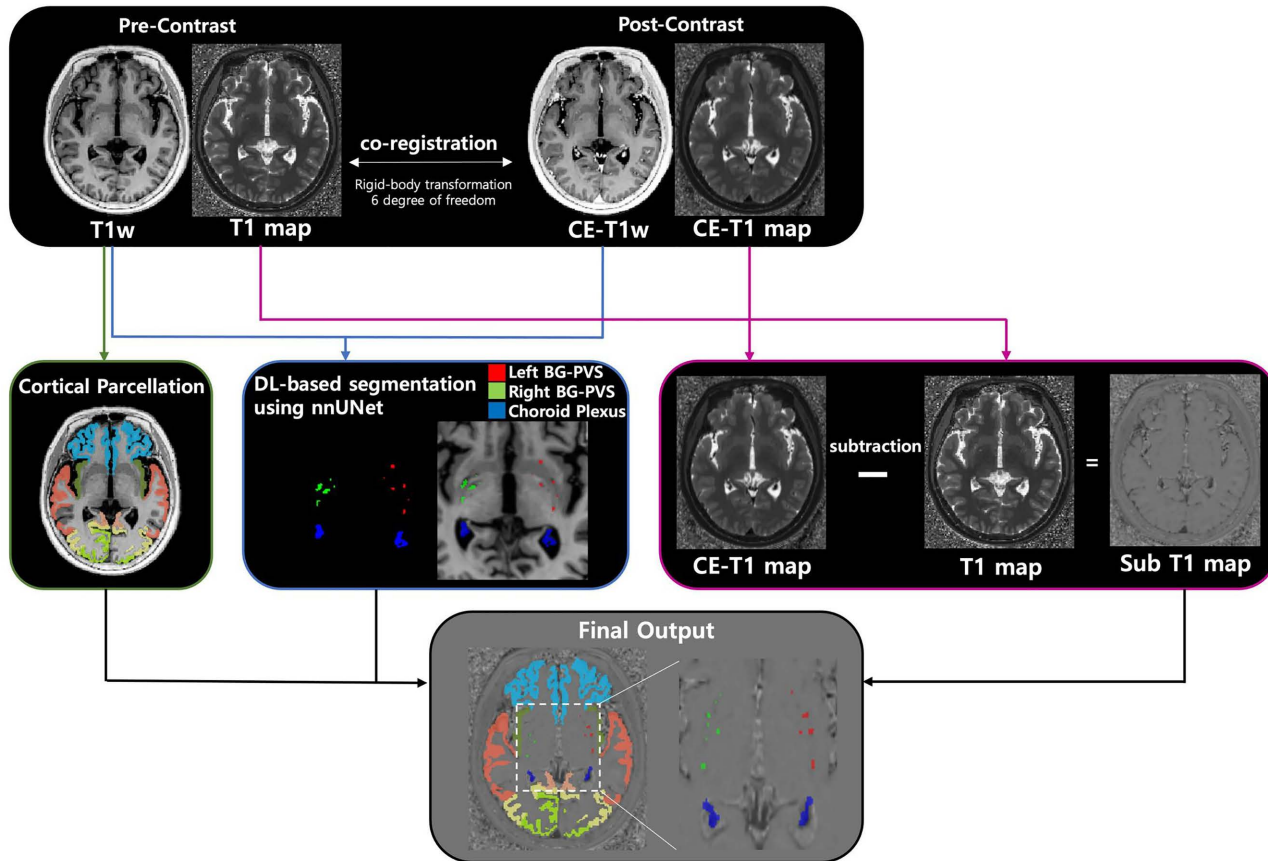

**Fig 2. Schematic workflow of image preprocessing.**

<https://doi.org/10.1371/journal.pone.0346730.g002>

## Results

### Characteristics of the study participants

Overall, 447 participants were included in the final analysis. The mean age was  $63.0 \pm 13.3$  years, and 199 participants were male (44.5%) and 248 were female (55.5%). Clinical diagnoses included IPD ( $n=148$ , 33.1%), ET ( $n=81$ , 18.1%), multiple system atrophy ( $n=52$ , 11.6%), progressive supranuclear palsy ( $n=13$ , 2.9%), and vascular parkinsonism ( $n=10$ , 2.2%). The remaining 143 participants (32.0%) were classified under other diagnoses.

With respect to MRI acquisition timing, daytime scans accounted for 307 cases (68.7%), whereas nighttime scans accounted for 140 cases (31.3%). Detailed baseline characteristics of the participants are presented in [Table 1](#).

### Baseline comparison of daytime and nighttime cohorts

Baseline characteristics stratified by MRI acquisition time are presented in [Table 2](#). The daytime ( $n=307$ ) and nighttime ( $n=140$ ) cohorts were comparable, showing no significant differences in age ( $P=0.853$ ) or sex distribution ( $P=0.562$ ). However, a significant difference was observed in the distribution of clinical diagnoses ( $P=0.007$ ). Post-hoc analysis indicated that this difference was primarily driven by the lower proportion of patients with ET in the nighttime group (21.0%) compared with that of patients with IPD (43.2%; Bonferroni-adjusted  $P=0.013$ ). Therefore, this variable was included as

**Table 1. Baseline clinical characteristics of the study participants.**

| Variables                      | n = 447     |
|--------------------------------|-------------|
| Age                            | 63.0 ± 13.3 |
| Sex, n (%)                     |             |
| Male                           | 199 (44.5)  |
| Female                         | 248 (55.5)  |
| Diagnoses, n (%)               |             |
| Idiopathic Parkinson's disease | 148 (33.1)  |
| Essential tremor               | 81 (18.1)   |
| Multiple system atrophy        | 52 (11.6)   |
| Progressive supranuclear palsy | 13 (2.9)    |
| Vascular parkinsonism          | 10 (2.2)    |
| Others                         | 143 (32.0)  |
| MRI acquisition period*, n (%) |             |
| Daytime                        | 307 (68.7)  |
| Nighttime                      | 140 (31.3)  |

MRI, magnetic resonance imaging.

\* Daytime was defined as 06:00–17:59, and nighttime as 18:00–05:59.

<https://doi.org/10.1371/journal.pone.0346730.t001>

**Table 2. Clinical variables by MRI acquisition time.**

| Variables                      | Day (n = 307)     | Night (n = 140)   | P-value |
|--------------------------------|-------------------|-------------------|---------|
| Age, median [IQR]              | 65.0 [59.0; 72.0] | 66.0 [57.5; 72.0] | 0.853   |
| Sex, n (%)                     |                   |                   | 0.562   |
| Male                           | 140 (45.6)        | 59 (42.1)         |         |
| Female                         | 167 (54.4)        | 81 (57.9)         |         |
| Diagnoses, n (%)               |                   |                   | 0.007   |
| Idiopathic Parkinson's disease | 84 (27.4)         | 64 (45.7)         |         |
| Essential tremor               | 64 (20.8)         | 17 (12.1)         |         |
| Multiple system atrophy        | 39 (12.7)         | 13 (9.3)          |         |
| Progressive supranuclear palsy | 10 (3.3)          | 3 (2.1)           |         |
| Vascular parkinsonism          | 7 (2.3)           | 3 (2.1)           |         |
| Others                         | 103 (33.6)        | 40 (28.6)         |         |

MRI, magnetic resonance imaging; IQR, interquartile range.

\*The relative proportion of patients diagnosed with idiopathic Parkinson's disease and essential tremor differed significantly between the day and night groups (pairwise Fisher's exact test, Bonferroni-adjusted  $P=0.013$ ).

<https://doi.org/10.1371/journal.pone.0346730.t002>

a covariate in subsequent analyses to control for its potential influence. Post-contrast acquisition timing was comparable between groups, with a median delay of 5.9 minutes (IQR, 5.5–6.5) during daytime and 6.0 minutes (IQR, 5.5–6.4) during nighttime ( $P=0.660$ ).

### Day-night differences in early-phase GBCA enhancement

The primary outcome of the study was the difference in early-phase GBCA enhancement ( $\Delta T_1$ ) between daytime and nighttime cohorts, with results summarized in [Table 3](#). After adjusting for age, sex, and clinical diagnoses, participants scanned during the day exhibited significantly greater GBCA enhancement in the cortex compared with those scanned at night. This effect was consistently observed in global measures of the cerebral cortex (adjusted  $P=0.022$ ) and cerebellar

**Table 3. Regional  $\Delta T_1$  values compared by MRI acquisition time.**

| Brain region (median [IQR])                 | Day (n = 307)          | Night (n = 140)        | Unadjusted <i>P</i> -value | Adjusted <i>P</i> -value |
|---------------------------------------------|------------------------|------------------------|----------------------------|--------------------------|
| <b>Global cortical measures</b>             |                        |                        |                            |                          |
| Cerebral cortex                             | -166.4 [-180.9;-151.7] | -160.9 [-175.1;-150.6] | 0.031                      | 0.022                    |
| Cerebellar cortex                           | -174.6 [-189.7;-156.8] | -165.0 [-184.5;-153.3] | 0.029                      | 0.042                    |
| <b>Regional cortical lobes</b>              |                        |                        |                            |                          |
| Frontal cortex                              | -147.5 [-164.5;-131.1] | -144.0 [-157.1;-125.9] | 0.048                      | 0.031                    |
| Parietal cortex                             | -169.0 [-182.7;-152.4] | -163.3 [-176.9;-147.0] | 0.013                      | 0.007                    |
| Temporal cortex                             | -170.2 [-184.7;-156.9] | -166.7 [-179.9;-154.3] | 0.102                      | 0.041                    |
| Occipital cortex                            | -229.3 [-251.7;-207.8] | -223.1 [-250.0;-204.3] | 0.234                      | 0.221                    |
| <b>Cerebral and cerebellar white matter</b> |                        |                        |                            |                          |
| Cerebral white matter                       | -39.3 [-44.6;-32.6]    | -38.4 [-44.9;-33.4]    | 0.754                      | 0.726                    |
| Cerebellar white matter                     | -50.4 [-59.2;-44.7]    | -50.3 [-57.6;-43.6]    | 0.602                      | 0.594                    |
| <b>Basal ganglia perivascular spaces</b>    |                        |                        |                            |                          |
|                                             | -87.2 [-102.5;-75.2]   | -88.5 [-103.4;-74.8]   | 0.861                      | 0.860                    |
| <b>Choroid plexus</b>                       |                        |                        |                            |                          |
|                                             | -869.7 [-937.7;-791.9] | -869.2 [-937.1;-812.2] | 0.646                      | 0.672                    |

MRI, magnetic resonance imaging; IQR, interquartile range; ANCOVA, analysis of covariance.

\*Adjusted *P*-values were calculated using ANCOVA after adjustment for age, sex, and clinical diagnoses.

<https://doi.org/10.1371/journal.pone.0346730.t003>

cortex (adjusted  $P=0.042$ ). Regional analysis further localized this pattern to the frontal (adjusted  $P=0.031$ ), parietal (adjusted  $P=0.007$ ), and temporal (adjusted  $P=0.041$ ) cortical lobes. In contrast, no day-night difference was observed in other brain structures. No significant differences in enhancement were found in the cerebral white matter (adjusted  $P=0.726$ ), cerebellar white matter (adjusted  $P=0.594$ ), basal ganglia PVS (adjusted  $P=0.860$ ), or CP ( $P=0.672$ ). Unadjusted comparisons yielded broadly similar findings.

### Association Between age and cortical GBCA enhancement by scan time

To investigate the influence of age on early-phase GBCA enhancement, linear regression analyses were performed stratified by scan time, evaluating the association between age and regional cortical  $\Delta T_1$  values while adjusting for sex and clinical diagnosis. Detailed results for analyzed regions are presented in [Table 4](#). Associations in the four major cortical regions are visualized in [Fig 3](#).

During daytime scans, age was significantly associated with lower  $\Delta T_1$  values, indicating greater GBCA enhancement, across all analyzed cortical regions: frontal ( $\beta=-0.34$ ,  $P=0.004$ ), parietal ( $\beta=-0.39$ ,  $P<0.001$ ), temporal ( $\beta=-0.55$ ,  $P<0.001$ ), and occipital cortices ( $\beta=-0.94$ ,  $P<0.001$ ).

During nighttime scans, significant associations persisted in the parietal ( $\beta=-0.44$ ,  $P=0.003$ ), temporal ( $\beta=-0.37$ ,  $P=0.004$ ), and occipital cortices ( $\beta=-1.09$ ,  $P<0.001$ ), whereas no significant relationship was observed in the frontal cortex ( $\beta=-0.04$ ,  $P=0.784$ ).

Despite these regional differences, interaction analyses revealed no significant differences in the age-related slopes between daytime and nighttime cohorts (all interaction  $P>0.05$ ), indicating that the effect of aging on early-phase GBCA enhancement was consistent regardless of scan time.

### Discussion

This study provides quantitative evidence that very early-phase parenchymal enhancement of intravenously administered GBCA is influenced by time of day. GBCA enhancement, reflected by greater reductions in T1 relaxation time ( $\Delta T_1$ ), was significantly more pronounced in the cerebral and cerebellar cortices of individuals scanned during daytime compared

**Table 4. Linear regression analysis of age and regional  $\Delta T1$  values by scan time.**

| Brain region                                | Day (n = 307)        |         | Night (n = 140)      |         | Interaction P-value |
|---------------------------------------------|----------------------|---------|----------------------|---------|---------------------|
|                                             | $\beta$ -coefficient | P-value | $\beta$ -coefficient | P-value |                     |
| <b>Global cortical measures</b>             |                      |         |                      |         |                     |
| Cerebral cortex                             | -0.47                | < 0.001 | -0.34                | 0.014   | 0.533               |
| Cerebellar cortex                           | 0.02                 | 0.891   | 0.09                 | 0.567   | 0.692               |
| <b>Regional cortical lobes</b>              |                      |         |                      |         |                     |
| Frontal cortex                              | -0.34                | 0.004   | -0.04                | 0.784   | 0.337               |
| Parietal cortex                             | -0.39                | < 0.001 | -0.44                | 0.003   | 0.986               |
| Temporal cortex                             | -0.55                | < 0.001 | -0.37                | 0.004   | 0.356               |
| Occipital cortex                            | -0.94                | < 0.001 | -1.09                | < 0.001 | 0.652               |
| <b>Cerebral and cerebellar white matter</b> |                      |         |                      |         |                     |
| Cerebral white matter                       | -0.15                | < 0.001 | -0.16                | 0.017   | 0.66                |
| Cerebellar white matter                     | -0.16                | 0.001   | -0.11                | 0.205   | 0.657               |
| <b>Basal ganglia perivascular spaces</b>    | -0.51                | < 0.001 | -0.29                | 0.07    | 0.286               |
| <b>Choroid plexus</b>                       | -0.90                | 0.079   | -1.66                | 0.014   | 0.601               |

Adjusted for sex and clinical diagnosis.

<https://doi.org/10.1371/journal.pone.0346730.t004>

with that of nighttime. In addition, advancing age was consistently associated with stronger enhancement across most cortical regions. Collectively, these findings are consistent with the hypothesis that glymphatic function may exhibit diurnal variations and progressively decline with aging, though the modest effect sizes and retrospective design warrant cautious interpretation.

The present findings are consistent with intrinsic circadian modulation beyond the immediate arousal state [20]. As participants were imaged while awake, the observed day-night differences are unlikely to be explained solely by concurrent sleep during acquisition. This interpretation converges with recent findings from a non-contrast MRI approach: Ko et al. using DTI-ALPS demonstrated lower daytime ALPS indices, a proxy for perivascular water diffusivity, compared with nighttime [21]. The concordance of results from two distinct methodologies strengthens the argument that diurnal regulation of brain fluid dynamics may reflect a genuine biological phenomenon rather than a method-specific effect.

The methodological approach in this study differs from prior delayed-phase studies that focus on net clearance. For instance, a prospective study by Lee et al. in healthy volunteers, using imaging at 2 and 12 h post-injection, showed that a night of sleep enhances net GBCA elimination [17]. In contrast, the present study examined a single early time point to assess initial tracer dynamics. This emphasis on early-phase enhancement is supported by animal research from Taoka et al., who demonstrated in rats that parenchymal enhancement from intravenous GBCA peaks significantly later than the initial influx into the CSF, indicating a distinct early phase of contrast distribution [34]. The biological validity of capturing such early dynamics in humans is reinforced by findings from Sun et al., which demonstrated GBCA entry into the CSF within seconds to minutes of injection [12]. By focusing on the initial distribution and short-term retention of the contrast agent, our design is well-suited to detect the immediate suppression of clearance that occurs during the day, and it remains complementary to studies that quantify net elimination over longer intervals.

A plausible biological mechanism for this diurnal modulation is the circadian regulation of noradrenergic tone from the locus coeruleus [20,35]. This control by the brain's central clock results in noradrenergic signaling peaking during the biological day to promote active wakefulness. Elevated norepinephrine is known to diminish the effective interstitial volume via astrocytic mechanisms, thereby increasing hydraulic resistance and attenuating convective fluid exchange [19,36]. The anatomical specificity of the findings strongly supports this interpretation, as significant day-night differences were

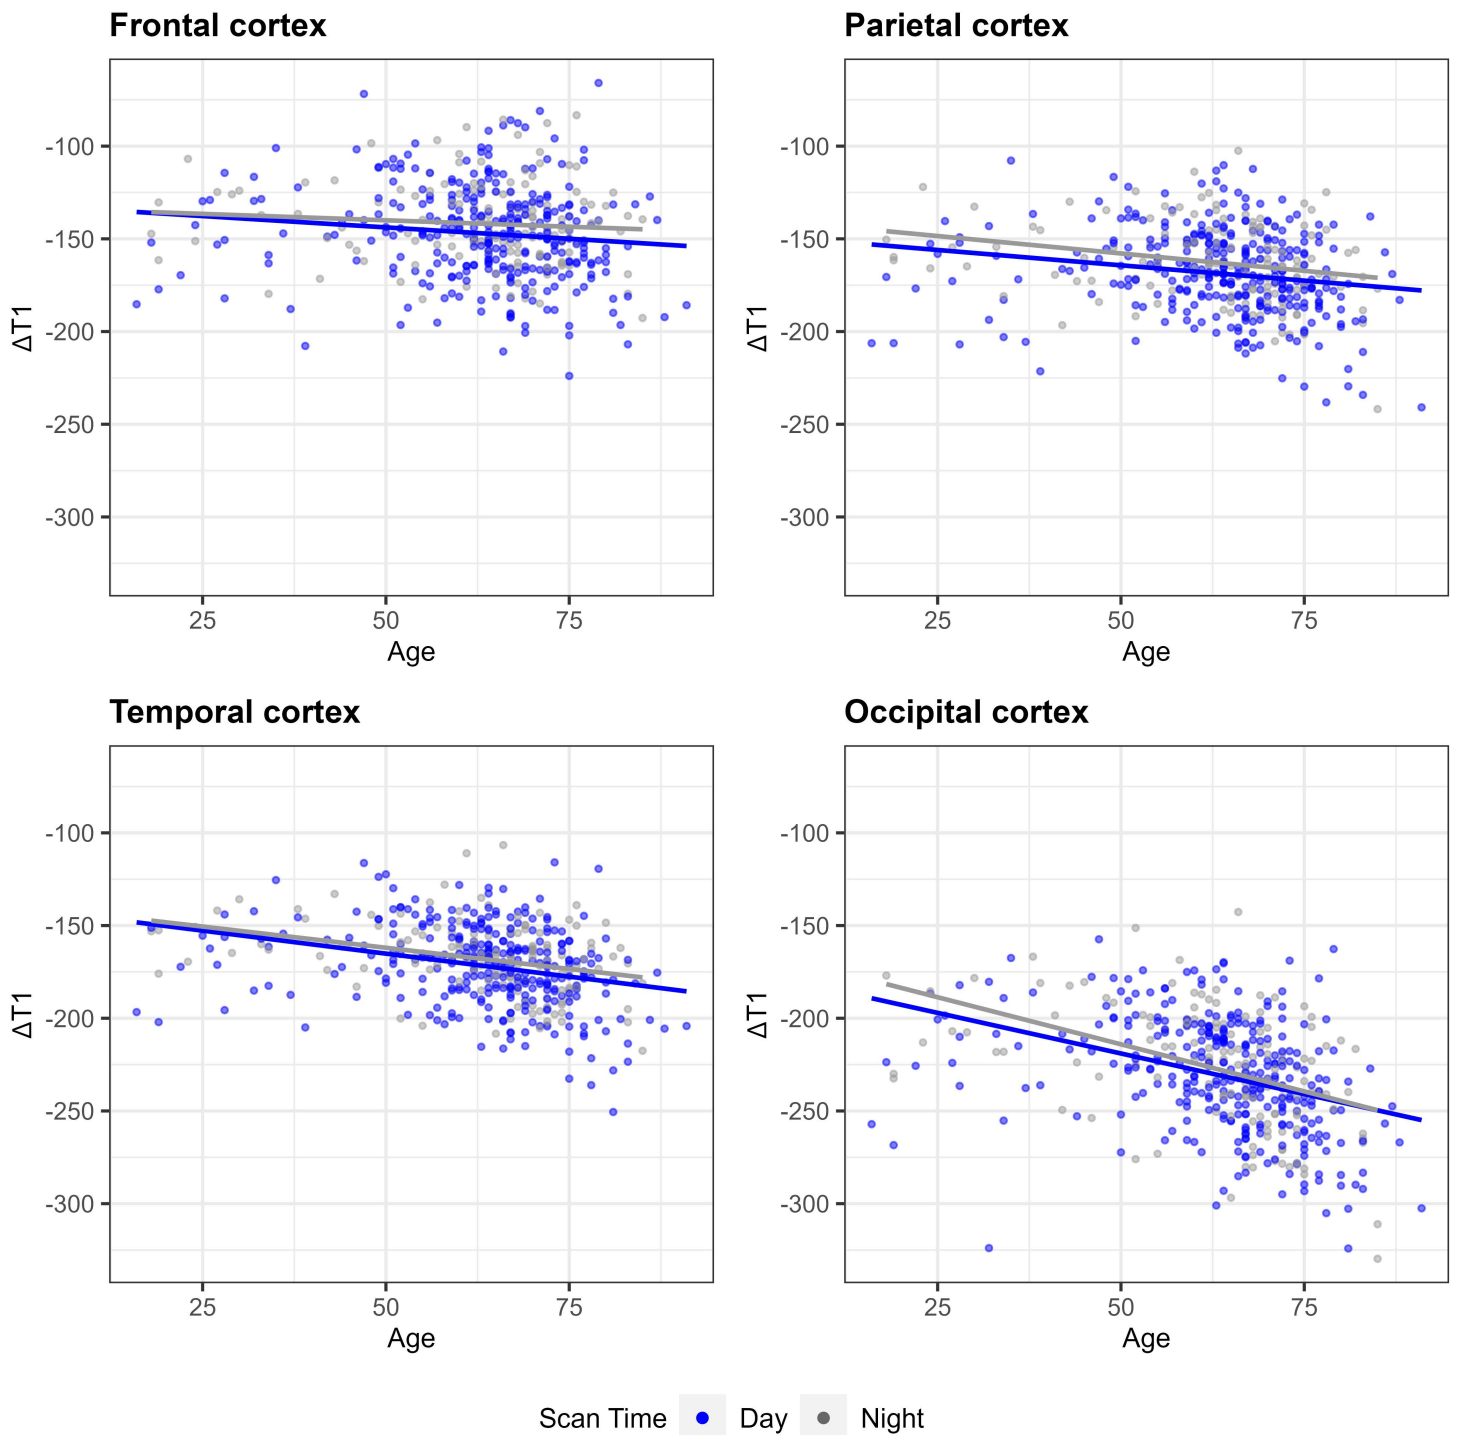

**Fig 3. Scatterplots of  $\Delta T_1$  versus age in the cerebral cortex.** Scatterplots depict the relationship between age (x-axis) and change in T1 relaxation time ( $\Delta T_1$ , y-axis) across four distinct cortical regions. In each plot, data points and their corresponding linear regression lines are stratified by scan time: daytime (blue) and nighttime (gray). Across all regions, a consistent negative correlation indicates that GBCA enhancement becomes more pronounced with increasing age, a trend irrespective of scan time.

<https://doi.org/10.1371/journal.pone.0346730.g003>

confined to the cerebral and cerebellar gray matter, territories with prominent perivascular astroglial interfaces characterized by AQP4-polarized endfeet that are critical for this process [37]. Within this framework, higher daytime noradrenergic tone would favor a relative compaction of the ISF in AQP4-rich areas, impeding early clearance of GBCA from the parenchyma and manifesting as greater short latency retention.

No day-night difference was detected in CP enhancement levels (adjusted  $P=0.672$ ), which serves as an internal control for initial tracer entry into the CSF. This finding suggests that early influx is comparable between daytime and nighttime cohorts, and that downstream clearance dynamics within the parenchyma likely drive the cortical effects. Notably, although the age slope for CP reached significance within the nighttime cohort, the age  $\times$  scan-time interaction was not significant ( $P=0.601$ ; Table 4), indicating that the age- $\Delta T1$  relationship did not differ by scan time. Thus, aging consistently increases early retention, as reflected by greater enhancement, whereas the relative magnitude of diurnal fluctuation appears preserved. These observations imply that chronic age-related deterioration and acute circadian modulation may be governed by partially distinct mechanisms.

This study has several limitations. First, the retrospective, single-center design and inclusion of patients with suspected movement disorders may limit generalizability. Although known confounders were adjusted for, the inclusion of patients with various movement disorders and differing diagnostic distributions between groups could introduce unmeasured biases. Second, clock time was used as a proxy for circadian phase, which does not account for individual variations in sleep patterns or the potential influence of medications on glymphatic activity. Additionally, although all participants were instructed to remain awake and unседated, wakefulness could not be objectively verified during the scan, and brief episodes of drowsiness or microsleep cannot be excluded. Third, the use of a single early post-contrast time point provides only a snapshot of GBCA retention and does not permit a full influx-efflux kinetic analysis. Fourth, the  $\Delta T1$  measurement reflects a composite of intravascular, perivascular, and interstitial compartments, preventing complete separation of glymphatic clearance from subtle, age-related changes in BBB permeability. Fifth, circadian variations in cerebral blood flow, blood pressure, body temperature, and hydration status may have influenced GBCA delivery and tissue enhancement independently of glymphatic function [38,39], though the absence of day-night differences in choroid plexus enhancement suggests that systemic GBCA delivery was comparable between groups. Finally, our findings were not validated in an independent cohort, and external validation is warranted.

In conclusion, early-phase cortical GBCA enhancement appears to be modestly greater during the day than at night and increases with age. This pattern is consistent with a clearance-limited interpretation, in which aging may be associated with chronically impaired clearance, and nocturnal states may acutely facilitate clearance. Prospective longitudinal studies incorporating objective sleep and circadian measures, together with time-resolved imaging, are warranted to further delineate these mechanisms and their clinical implications.

## Supporting information

**S1 Table. MRI acquisition parameters.**  
(DOCX)

## Author contributions

**Conceptualization:** Dongjun Lee, Yangsean Choi.

**Data curation:** Sungyang Jo, Sun Ju Chung.

**Formal analysis:** Dongjun Lee, Yangsean Choi.

**Funding acquisition:** Yangsean Choi.

**Investigation:** Sungyang Jo, Sun Ju Chung.

**Methodology:** Dongjun Lee, Yangsean Choi, Yoonho Nam.

**Software:** Yoonho Nam.

**Supervision:** Ho-Sung Kim.

**Visualization:** Yangsean Choi, Eunseon Jeong, Yoonho Nam.

**Writing – original draft:** Dongjun Lee, Yangsean Choi, Eunseon Jeong, Yoonho Nam.

**Writing – review & editing:** Dongjun Lee, Yangsean Choi, Sungyang Jo, Sun Ju Chung, Ho-Sung Kim.

## References

1. Iliff JJ, Wang M, Liao Y, Plogg BA, Peng W, Gundersen GA, et al. A paravascular pathway facilitates CSF flow through the brain parenchyma and the clearance of interstitial solutes, including amyloid  $\beta$ . *Sci Transl Med*. 2012;4(147):147ra111. <https://doi.org/10.1126/scitranslmed.3003748> PMID: [22896675](https://pubmed.ncbi.nlm.nih.gov/22896675/)
2. Iliff JJ, Lee H, Yu M, Feng T, Logan J, Nedergaard M, et al. Brain-wide pathway for waste clearance captured by contrast-enhanced MRI. *J Clin Invest*. 2013;123(3):1299–309. <https://doi.org/10.1172/JCI67677> PMID: [23434588](https://pubmed.ncbi.nlm.nih.gov/23434588/)
3. Patel TK, Habimana-Griffin L, Gao X, Xu B, Achilefu S, Alitalo K, et al. Dural lymphatics regulate clearance of extracellular tau from the CNS. *Mol Neurodegener*. 2019;14(1):11. <https://doi.org/10.1186/s13024-019-0312-x> PMID: [30813965](https://pubmed.ncbi.nlm.nih.gov/30813965/)
4. Kress BT, Iliff JJ, Xia M, Wang M, Wei HS, Zeppenfeld D, et al. Impairment of paravascular clearance pathways in the aging brain. *Ann Neurol*. 2014;76(6):845–61. <https://doi.org/10.1002/ana.24271> PMID: [25204284](https://pubmed.ncbi.nlm.nih.gov/25204284/)
5. Aspelund A, Antila S, Proulx ST, Karlisen TV, Karaman S, Detmar M, et al. A dural lymphatic vascular system that drains brain interstitial fluid and macromolecules. *J Exp Med*. 2015;212(7):991–9. <https://doi.org/10.1084/jem.20142290> PMID: [26077718](https://pubmed.ncbi.nlm.nih.gov/26077718/)
6. Louveau A, Smirnov I, Keyes TJ, Eccles JD, Rouhani SJ, Peske JD, et al. Structural and functional features of central nervous system lymphatic vessels. *Nature*. 2015;523(7560):337–41. <https://doi.org/10.1038/nature14432> PMID: [26030524](https://pubmed.ncbi.nlm.nih.gov/26030524/)
7. Tarasoff-Conway JM, Carare RO, Osorio RS, Glodzik L, Butler T, Fieremans E, et al. Clearance systems in the brain—implications for Alzheimer disease. *Nat Rev Neurol*. 2015;11(8):457–70. <https://doi.org/10.1038/nrneuro.2015.119> PMID: [26195256](https://pubmed.ncbi.nlm.nih.gov/26195256/)
8. Buccellato FR, D’Anca M, Serpente M, Arighi A, Galimberti D. The Role of Glymphatic System in Alzheimer’s and Parkinson’s Disease Pathogenesis. *Biomedicines*. 2022;10(9):2261. <https://doi.org/10.3390/biomedicines10092261> PMID: [36140362](https://pubmed.ncbi.nlm.nih.gov/36140362/)
9. Essig M, Dinkel J, Gutierrez JE. Use of contrast media in neuroimaging. *Magn Reson Imaging Clin N Am*. 2012;20(4):633–48. <https://doi.org/10.1016/j.mric.2012.08.001> PMID: [23088943](https://pubmed.ncbi.nlm.nih.gov/23088943/)
10. Jost G, Frenzel T, Lohrke J, Lenhard DC, Naganawa S, Pietsch H. Penetration and distribution of gadolinium-based contrast agents into the cerebrospinal fluid in healthy rats: a potential pathway of entry into the brain tissue. *Eur Radiol*. 2017;27(7):2877–85. <https://doi.org/10.1007/s00330-016-4654-2> PMID: [27832312](https://pubmed.ncbi.nlm.nih.gov/27832312/)
11. Berger F, Kubik-Huch RA, Niemann T, Schmid HR, Poetzsch M, Froehlich JM, et al. Gadolinium Distribution in Cerebrospinal Fluid after Administration of a Gadolinium-based MR Contrast Agent in Humans. *Radiology*. 2018;288(3):703–9. <https://doi.org/10.1148/radiol.2018171829> PMID: [29737953](https://pubmed.ncbi.nlm.nih.gov/29737953/)
12. Sun Y, Cao D, Pillai JJ, Paez A, Li Y, Gu C, et al. Rapid imaging of intravenous gadolinium-based contrast agent (GBCA) entering ventricular cerebrospinal fluid (CSF) through the choroid plexus in healthy human subjects. *Fluids Barriers CNS*. 2024;21(1):72. <https://doi.org/10.1186/s12987-024-00571-3> PMID: [39285434](https://pubmed.ncbi.nlm.nih.gov/39285434/)
13. Eide PK, Vatnehol SAS, Emblem KE, Ringstad G. Magnetic resonance imaging provides evidence of glymphatic drainage from human brain to cervical lymph nodes. *Sci Rep*. 2018;8(1):7194. <https://doi.org/10.1038/s41598-018-25666-4> PMID: [29740121](https://pubmed.ncbi.nlm.nih.gov/29740121/)
14. Ringstad G, Valnes LM, Dale AM, Pripp AH, Vatnehol S-AS, Emblem KE, et al. Brain-wide glymphatic enhancement and clearance in humans assessed with MRI. *JCI Insight*. 2018;3(13):e121537. <https://doi.org/10.1172/jci.insight.121537> PMID: [29997300](https://pubmed.ncbi.nlm.nih.gov/29997300/)
15. Eide PK, Ringstad G. Delayed clearance of cerebrospinal fluid tracer from entorhinal cortex in idiopathic normal pressure hydrocephalus: A glymphatic magnetic resonance imaging study. *J Cereb Blood Flow Metab*. 2019;39(7):1355–68. <https://doi.org/10.1177/0271678X18760974> PMID: [29485341](https://pubmed.ncbi.nlm.nih.gov/29485341/)
16. Watts R, Steinklein JM, Waldman L, Zhou X, Filippi CG. Measuring Glymphatic Flow in Man Using Quantitative Contrast-Enhanced MRI. *AJNR Am J Neuroradiol*. 2019;40(4):648–51. <https://doi.org/10.3174/ajnr.A5931> PMID: [30679221](https://pubmed.ncbi.nlm.nih.gov/30679221/)
17. Lee S, Yoo R-E, Choi SH, Oh S-H, Ji S, Lee J, et al. Contrast-enhanced MRI T1 Mapping for Quantitative Evaluation of Putative Dynamic Glymphatic Activity in the Human Brain in Sleep-Wake States. *Radiology*. 2021;300(3):661–8. <https://doi.org/10.1148/radiol.2021203784> PMID: [34156299](https://pubmed.ncbi.nlm.nih.gov/34156299/)
18. Deike-Hofmann K, Reuter J, Haase R, Paech D, Gnirs R, Bickelhaupt S, et al. Glymphatic Pathway of Gadolinium-Based Contrast Agents Through the Brain: Overlooked and Misinterpreted. *Invest Radiol*. 2019;54(4):229–37. <https://doi.org/10.1097/RLI.0000000000000533> PMID: [30480554](https://pubmed.ncbi.nlm.nih.gov/30480554/)
19. Xie L, Kang H, Xu Q, Chen MJ, Liao Y, Thiyagarajan M, et al. Sleep drives metabolite clearance from the adult brain. *Science*. 2013;342(6156):373–7. <https://doi.org/10.1126/science.1241224> PMID: [24136970](https://pubmed.ncbi.nlm.nih.gov/24136970/)

20. Hablitz LM, Plá V, Giannetto M, Vinitsky HS, Stæger FF, Metcalfe T, et al. Circadian control of brain glymphatic and lymphatic fluid flow. *Nat Commun.* 2020;11(1):4411. <https://doi.org/10.1038/s41467-020-18115-2> PMID: [32879313](https://pubmed.ncbi.nlm.nih.gov/32879313/)
21. Ko JS, Choi Y, Jeong E, Park JE, Kim HS. Hourly Variations in Glymphatic Function Based on MRI Scan Times in Cognitively Normal Individuals. *Acad Radiol.* 2025;32(6):3631–8. <https://doi.org/10.1016/j.acra.2025.01.034> PMID: [39934074](https://pubmed.ncbi.nlm.nih.gov/39934074/)
22. Postuma RB, Berg D, Stern M, Poewe W, Olanow CW, Oertel W, et al. MDS clinical diagnostic criteria for Parkinson's disease. *Mov Disord.* 2015;30(12):1591–601. <https://doi.org/10.1002/mds.26424> PMID: [26474316](https://pubmed.ncbi.nlm.nih.gov/26474316/)
23. Bhatia KP, Bain P, Bajaj N, Elble RJ, Hallett M, Louis ED, et al. Consensus Statement on the classification of tremors. from the task force on tremor of the International Parkinson and Movement Disorder Society. *Mov Disord.* 2018;33(1):75–87. <https://doi.org/10.1002/mds.27121> PMID: [29193359](https://pubmed.ncbi.nlm.nih.gov/29193359/)
24. Jenkinson M, Smith S. A global optimisation method for robust affine registration of brain images. *Med Image Anal.* 2001;5(2):143–56. [https://doi.org/10.1016/s1361-8415\(01\)00036-6](https://doi.org/10.1016/s1361-8415(01)00036-6) PMID: [11516708](https://pubmed.ncbi.nlm.nih.gov/11516708/)
25. Greve DN, Fischl B. Accurate and robust brain image alignment using boundary-based registration. *Neuroimage.* 2009;48(1):63–72. <https://doi.org/10.1016/j.neuroimage.2009.06.060> PMID: [19573611](https://pubmed.ncbi.nlm.nih.gov/19573611/)
26. Jenkinson M, Beckmann CF, Behrens TEJ, Woolrich MW, Smith SM. FSL. *NeuroImage.* 2012;62:782–90. <https://doi.org/10.1016/j.neuroimage.2011.09.015>
27. Billot B, Greve DN, Puonti O, Thielscher A, Van Leemput K, Fischl B, et al. SynthSeg: Segmentation of brain MRI scans of any contrast and resolution without retraining. *Med Image Anal.* 2023;86:102789. <https://doi.org/10.1016/j.media.2023.102789> PMID: [36857946](https://pubmed.ncbi.nlm.nih.gov/36857946/)
28. Fischl B. FreeSurfer. *NeuroImage.* 2012;62: 774–81. <https://doi.org/10.1016/j.neuroimage.2012.01.021>
29. Reynolds D. Gaussian Mixture Models. *Encyclopedia of Biometrics.* Springer US. 2009. 659–63. [https://doi.org/10.1007/978-0-387-73003-5\\_196](https://doi.org/10.1007/978-0-387-73003-5_196)
30. Frangi AF, Niessen WJ, Vincken KL, Viergever MA. Multiscale vessel enhancement filtering. *Lecture Notes in Computer Science.* Springer Berlin Heidelberg. 1998. 130–7. <https://doi.org/10.1007/bfb0056195>
31. Isensee F, Jaeger PF, Kohl SAA, Petersen J, Maier-Hein KH. nnU-Net: a self-configuring method for deep learning-based biomedical image segmentation. *Nat Methods.* 2021;18(2):203–11. <https://doi.org/10.1038/s41592-020-01008-z> PMID: [33288961](https://pubmed.ncbi.nlm.nih.gov/33288961/)
32. Hsiao W-C, Chang H-I, Hsu S-W, Lee C-C, Huang S-H, Cheng C-H, et al. Association of Cognition and Brain Reserve in Aging and Glymphatic Function Using Diffusion Tensor Image-along the Perivascular Space (DTI-ALPS). *Neuroscience.* 2023;524:11–20. <https://doi.org/10.1016/j.neuroscience.2023.04.004> PMID: [37030632](https://pubmed.ncbi.nlm.nih.gov/37030632/)
33. Han F, Liu X, Yang Y, Liu X. Sex-specific age-related differences in cerebrospinal fluid clearance assessed by resting-state functional magnetic resonance imaging. *Neuroimage.* 2024;302:120905. <https://doi.org/10.1016/j.neuroimage.2024.120905> PMID: [39461604](https://pubmed.ncbi.nlm.nih.gov/39461604/)
34. Taoka T, Jost G, Frenzel T, Naganawa S, Pietsch H. Impact of the Glymphatic System on the Kinetic and Distribution of Gadodiamide in the Rat Brain: Observations by Dynamic MRI and Effect of Circadian Rhythm on Tissue Gadolinium Concentrations. *Invest Radiol.* 2018;53(9):529–34. <https://doi.org/10.1097/RLI.0000000000000473> PMID: [29652699](https://pubmed.ncbi.nlm.nih.gov/29652699/)
35. Aston-Jones G, Chen S, Zhu Y, Oshinsky ML. A neural circuit for circadian regulation of arousal. *Nat Neurosci.* 2001;4(7):732–8. <https://doi.org/10.1038/89522> PMID: [11426230](https://pubmed.ncbi.nlm.nih.gov/11426230/)
36. Berridge CW, Waterhouse BD. The locus coeruleus-noradrenergic system: modulation of behavioral state and state-dependent cognitive processes. *Brain Res Brain Res Rev.* 2003;42(1):33–84. [https://doi.org/10.1016/s0165-0173\(03\)00143-7](https://doi.org/10.1016/s0165-0173(03)00143-7) PMID: [12668290](https://pubmed.ncbi.nlm.nih.gov/12668290/)
37. Hubbard JA, Hsu MS, Seldin MM, Binder DK. Expression of the Astrocyte Water Channel Aquaporin-4 in the Mouse Brain. *ASN Neuro.* 2015;7(5):1759091415605486. <https://doi.org/10.1177/1759091415605486> PMID: [26489685](https://pubmed.ncbi.nlm.nih.gov/26489685/)
38. Conroy DA, Spielman AJ, Scott RQ. Daily rhythm of cerebral blood flow velocity. *J Circadian Rhythms.* 2005;3(1):3. <https://doi.org/10.1186/1740-3391-3-3> PMID: [15760472](https://pubmed.ncbi.nlm.nih.gov/15760472/)
39. Convertino VA. Blood volume response to physical activity and inactivity. *Am J Med Sci.* 2007;334(1):72–9. <https://doi.org/10.1097/MAJ.0b013e318063c6e4> PMID: [17630597](https://pubmed.ncbi.nlm.nih.gov/17630597/)
